# Supplementary material for: Comprehensive Analysis of SFRP Family Members Prognostic Value and Immune Infiltration in Gastric Cancer
Source: MDPI journal article supplement (doi:10.3390/life11060522), 2021-06-03
Supplement: s1 [file s1]

# Supplementary Materials

| Analysis Type by Cancer                                                                                 |  | Cancer vs. Normal |  | Cancer vs. Normal |  | Cancer vs. Normal |  | Cancer vs. Normal |  | Cancer vs. Normal |  |
|---------------------------------------------------------------------------------------------------------|--|-------------------|--|-------------------|--|-------------------|--|-------------------|--|-------------------|--|
|                                                                                                         |  | SFRP1             |  | SFRP2             |  | SFRP3<br>FRZB     |  | SFRP4             |  | SFRP5             |  |
| 1 5 10 10 5 1<br><br>% |  |                   |  |                   |  |                   |  |                   |  |                   |  |
| Bladder Cancer                                                                                          |  | 3                 |  | 1                 |  |                   |  | 1                 |  |                   |  |
| Brain and CNS Cancer                                                                                    |  | 3                 |  |                   |  |                   |  | 5                 |  |                   |  |
| Breast Cancer                                                                                           |  | 20                |  | 4 1               |  | 1 7               |  | 3                 |  |                   |  |
| Cervical Cancer                                                                                         |  |                   |  |                   |  |                   |  | 1                 |  |                   |  |
| Colorectal Cancer                                                                                       |  | 17                |  | 4                 |  | 9                 |  | 9                 |  |                   |  |
| Esophageal Cancer                                                                                       |  | 1                 |  |                   |  | 2                 |  | 2                 |  |                   |  |
| Gastric Cancer                                                                                          |  | 3                 |  | 1                 |  |                   |  | 6                 |  |                   |  |
| Head and Neck Cancer                                                                                    |  | 1                 |  |                   |  | 2                 |  |                   |  |                   |  |
| Kidney Cancer                                                                                           |  | 11                |  |                   |  | 3                 |  | 1                 |  |                   |  |
| Leukemia                                                                                                |  | 1                 |  |                   |  |                   |  |                   |  |                   |  |
| Liver Cancer                                                                                            |  |                   |  |                   |  | 3                 |  | 1                 |  |                   |  |
| Lung Cancer                                                                                             |  | 2                 |  | 1                 |  |                   |  |                   |  |                   |  |
| Lymphoma                                                                                                |  |                   |  | 2                 |  | 2                 |  |                   |  |                   |  |
| Melanoma                                                                                                |  | 2                 |  |                   |  | 1                 |  |                   |  |                   |  |
| Myeloma                                                                                                 |  |                   |  |                   |  | 2                 |  |                   |  |                   |  |
| Other Cancer                                                                                            |  | 1                 |  | 4                 |  | 1                 |  | 1 1               |  |                   |  |
| Ovarian Cancer                                                                                          |  | 3                 |  | 1                 |  | 1                 |  | 1                 |  |                   |  |
| Pancreatic Cancer                                                                                       |  |                   |  | 1                 |  |                   |  | 1                 |  | 1                 |  |
| Prostate Cancer                                                                                         |  | 1 1               |  |                   |  |                   |  | 2                 |  |                   |  |
| Sarcoma                                                                                                 |  | 1 3               |  |                   |  | 1                 |  |                   |  |                   |  |
| Significant Unique Analyses                                                                             |  | 3 71              |  | 13 7              |  | 10 24             |  | 30 5              |  |                   |  |
| Total Unique Analyses                                                                                   |  | 428               |  | 310               |  | 441               |  | 424               |  | 339               |  |

**Supplementary Figure S1.** The mRNA expression of *SFRPs* in different cancer types (Oncomine). Difference of transcriptional expression was compared by Students' *t*-test.

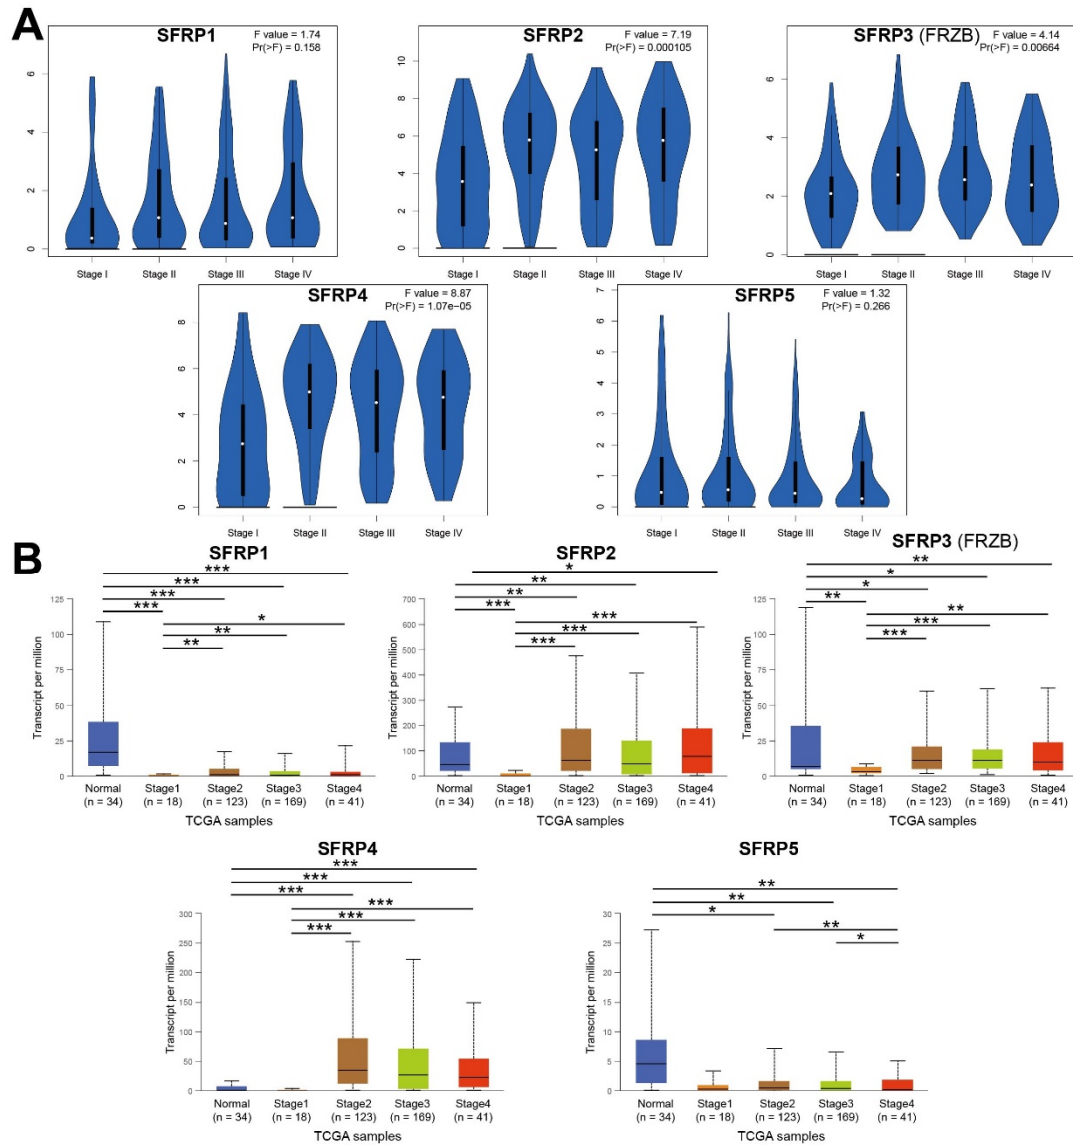

**Supplementary Figure S2.** Correlations between *SFRPs* expression and tumor stage in GC patients (A: GEPIA database, B: UALCAN database). One-way ANOVA was conducted for differential gene expression analysis using pathological stage as a variable and Log<sub>2</sub>(TPM + 1) transformed expression data were used for plotting in GEPIA.

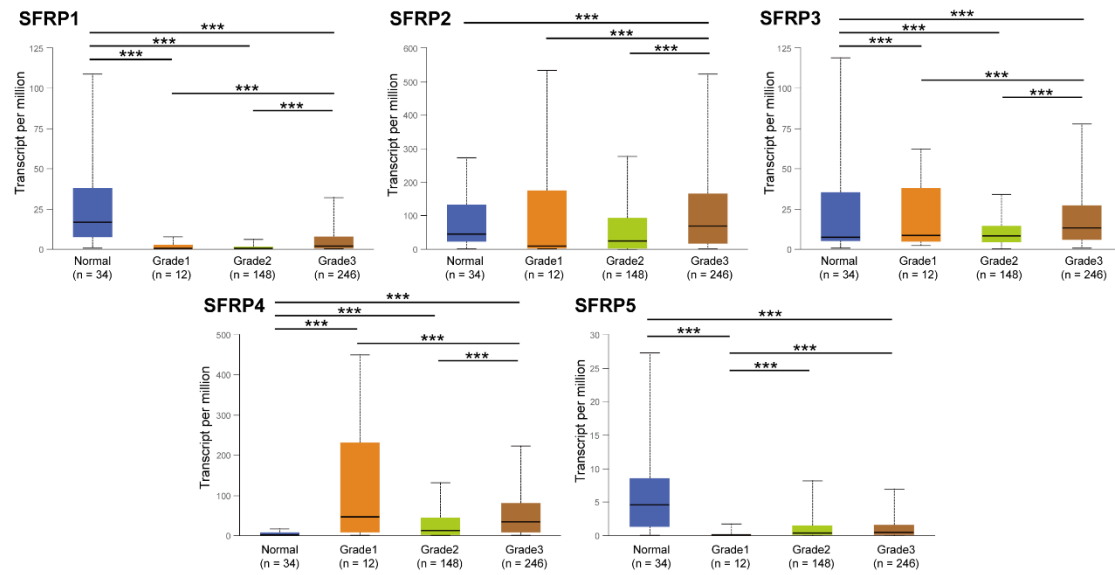

**Supplementary Figure S3.** The *SFRPs* expression in GC based on tumor grade (UALCAN database). The method for differential analysis is *t* test. \*:  $P < 0.05$ , \*\*:  $P < 0.01$ , \*\*\*:  $P < 0.001$ . Grade 1: well differentiated, Grade 2: moderately differentiated, Grade 3: poorly differentiated, Grade 4: undifferentiated.

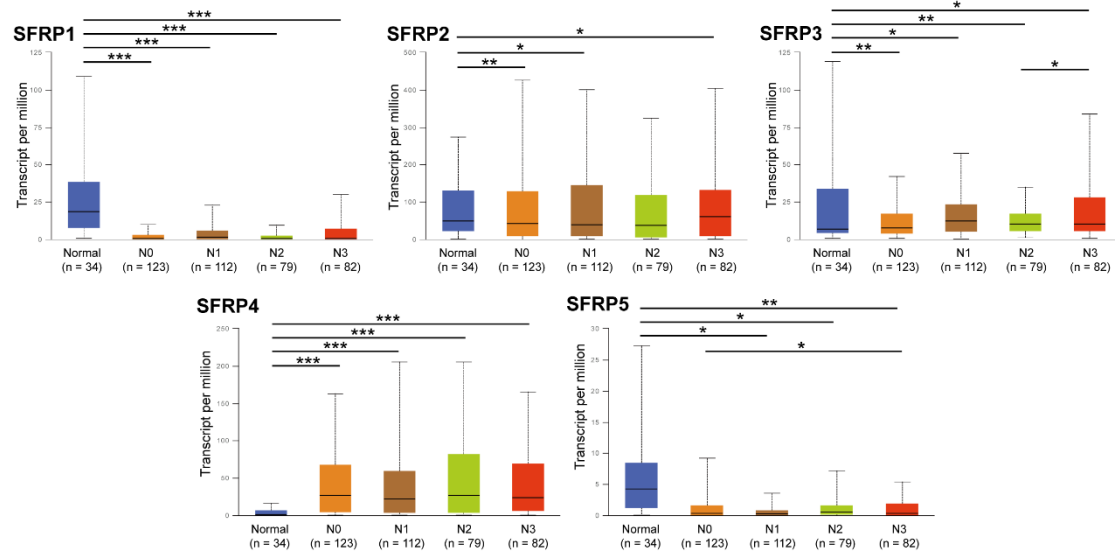

**Supplementary Figure S4.** The *SFRPs* expression in GC based on nodal metastasis status (UALCAN database). The method for differential analysis is *t* test. \*:  $P < 0.05$ , \*\*:  $P < 0.01$ , \*\*\*:  $P < 0.001$ . N0: no regional lymph node metastasis, N1: metastases in 1 to 3 axillary lymph nodes, N2: metastases in 4 to 9 axillary lymph nodes, N3: metastases in 10 or more axillary lymph nodes.

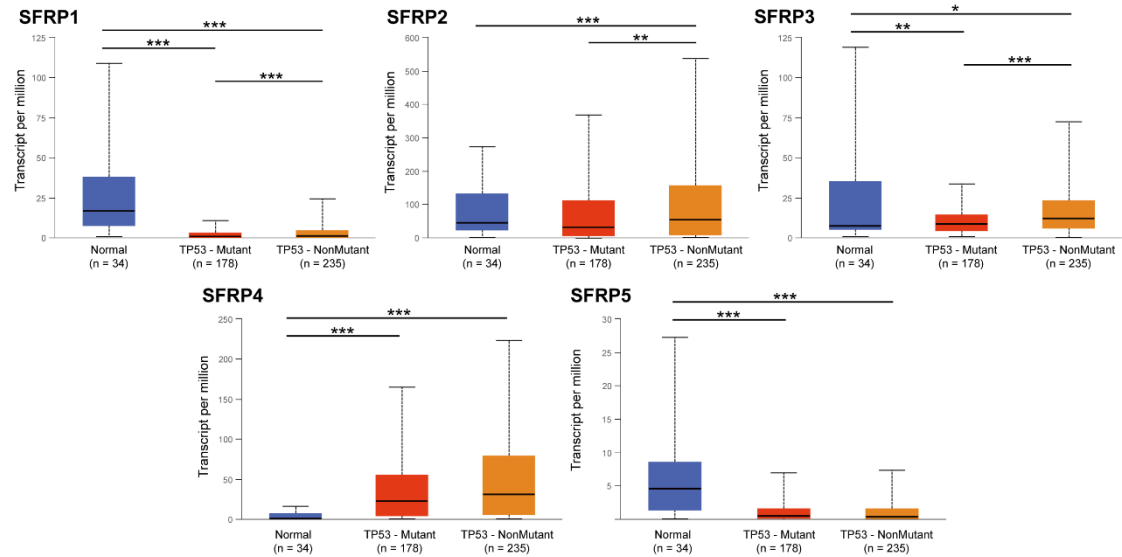

**Supplementary Figure S5.** The *SFRPs* expression in GC based on TP53 mutation status (UALCAN database). The method for differential analysis is *t* test. \*:  $P < 0.05$ , \*\*:  $P < 0.01$ , \*\*\*:  $P < 0.001$ .

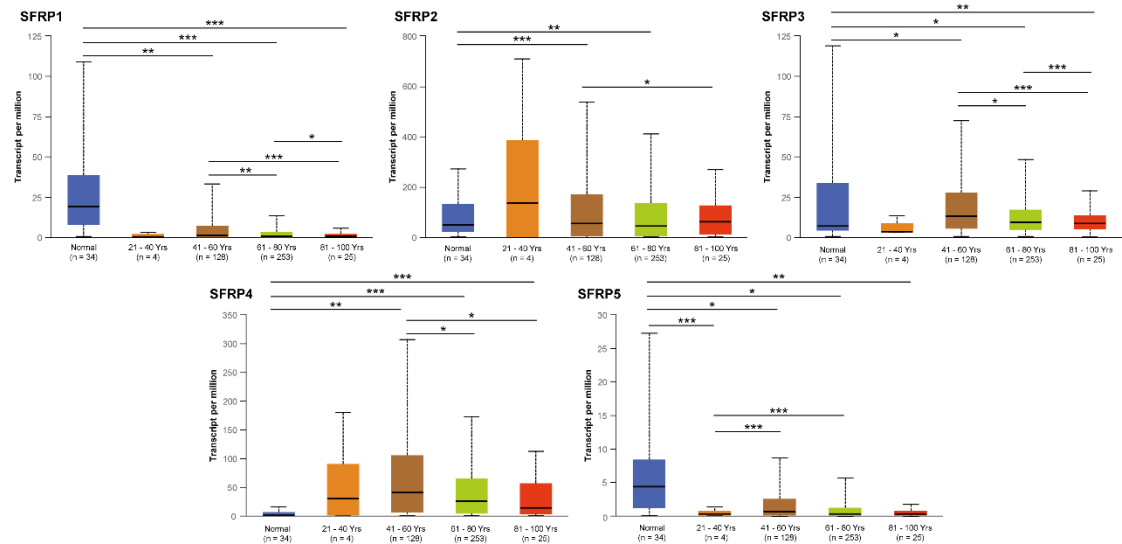

**Supplementary Figure S6.** The *SFRPs* expression in GC based on the ages of patients (UALCAN database). The method for differential analysis is *t* test. \*:  $P < 0.05$ , \*\*:  $P < 0.01$ , \*\*\*:  $P < 0.001$ . Yrs: years.

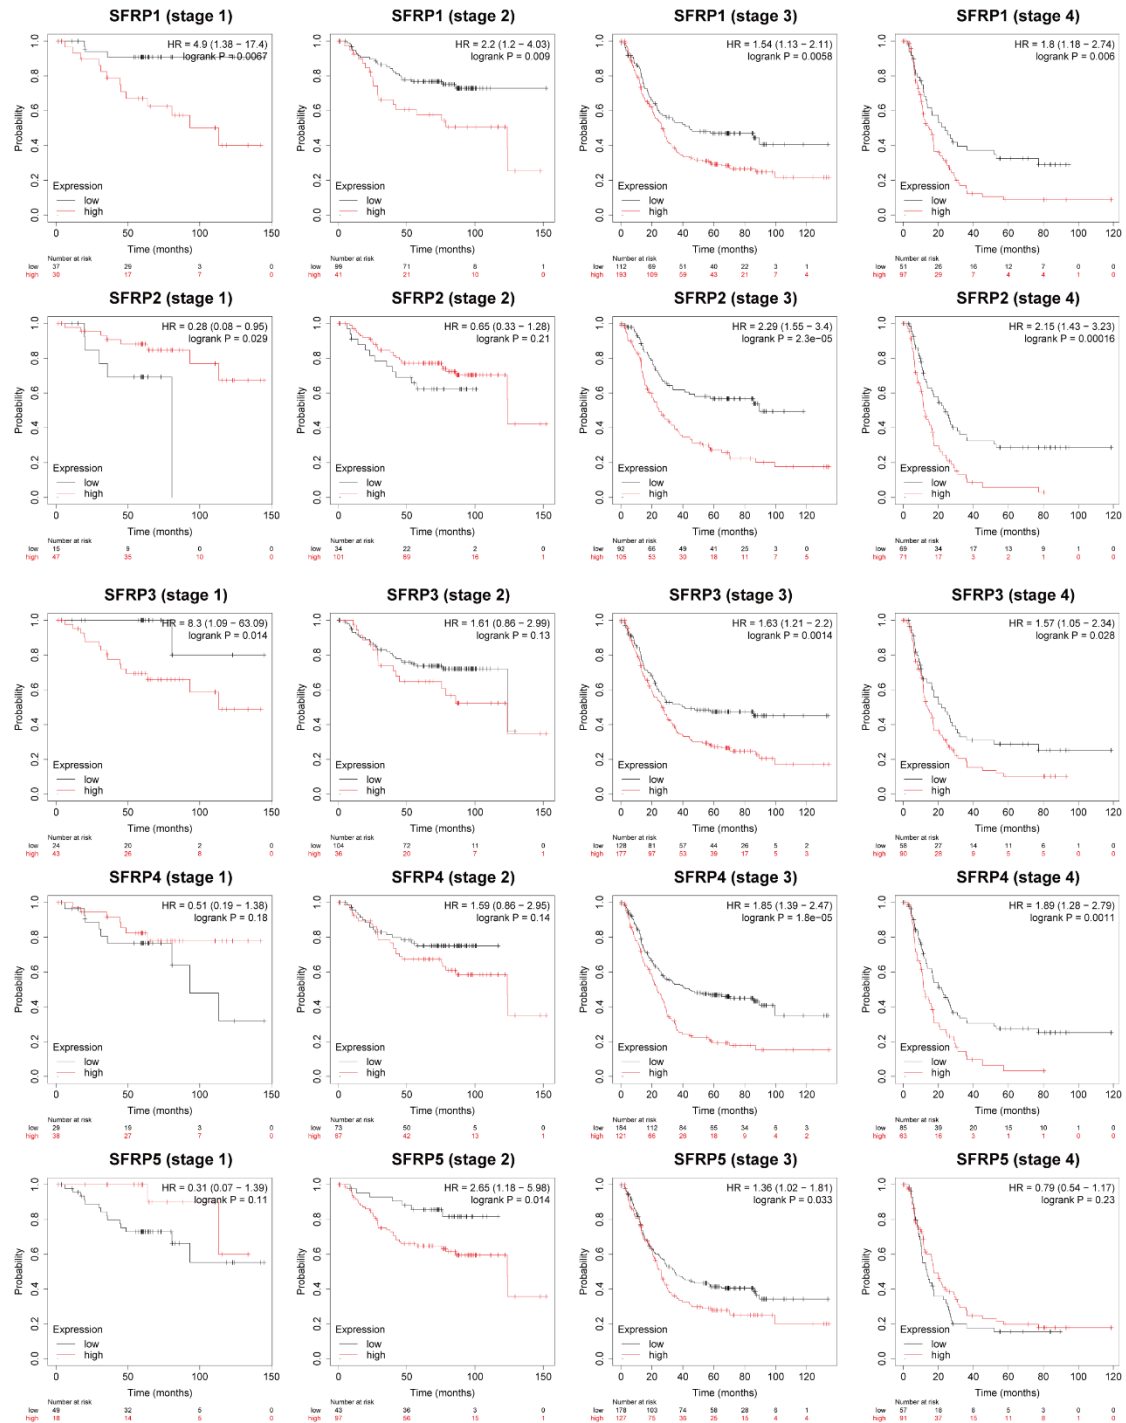

**Supplementary Figure S7.** The prognostic value of mRNA level of SFRPs in patients with different GC stages (Kaplan-Meier Plotter). The method for survival analysis is Log-rank test.

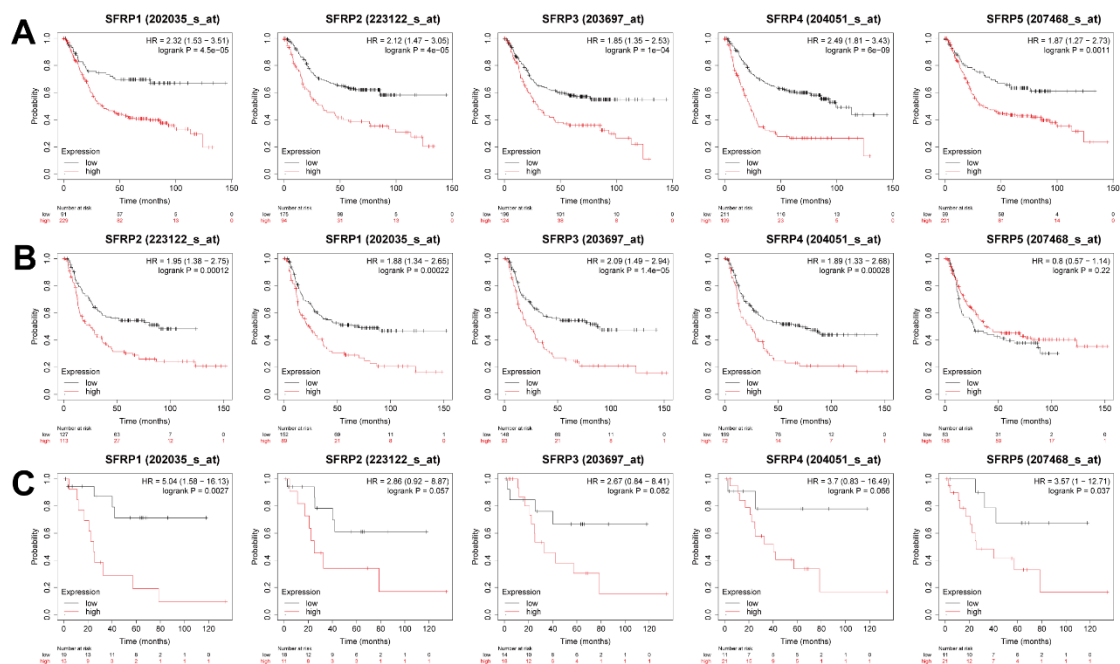

**Supplementary Figure S8.** The prognostic value of mRNA level of *SFRPs* in patients with different GC subtypes (Kaplan-Meier Plotter). A: intestinal type gastric carcinoma, B: diffuse type gastric carcinoma, C: mixed type gastric carcinoma. The method for survival analysis is Log-rank test.

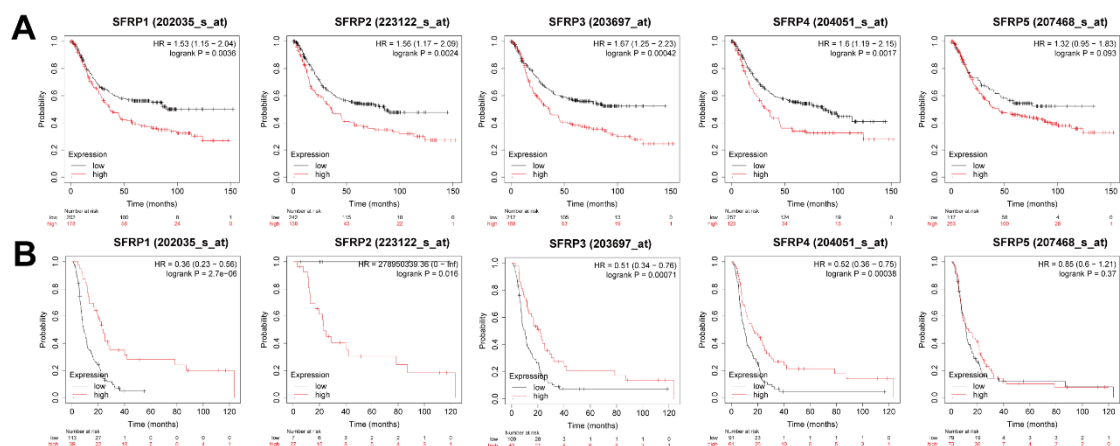

**Supplementary Figure S9.** The prognostic value of mRNA level of *SFRPs* in GC patients with different treatment (Kaplan-Meier Plotter). A: surgery alone, B: 5 FU based adjuvant therapy. The method for survival analysis is Log-rank test.

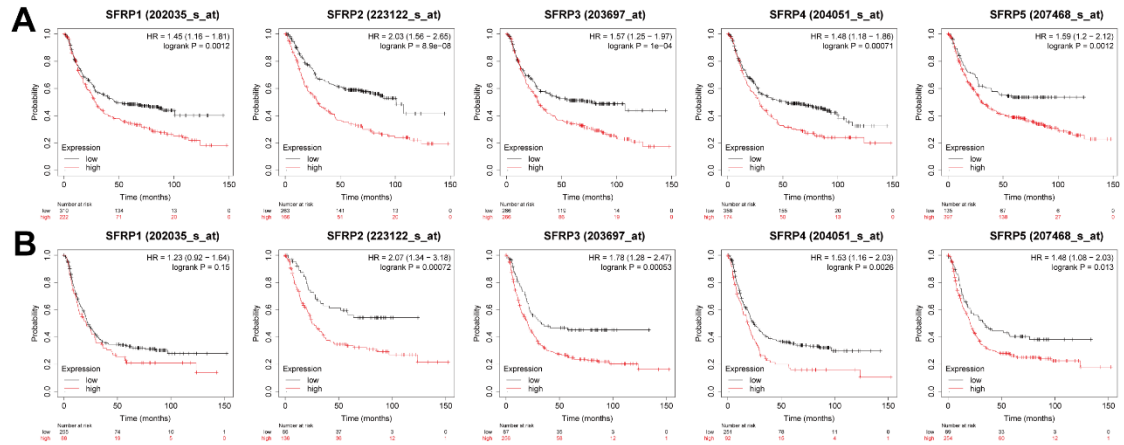

**Supplementary Figure S10.** The prognostic value of mRNA level of *SFRPs* in GC patients with different HER2 status (Kaplan-Meier Plotter). A: HER2 negative, B: HER2 positive. The method for survival analysis is Log-rank test.

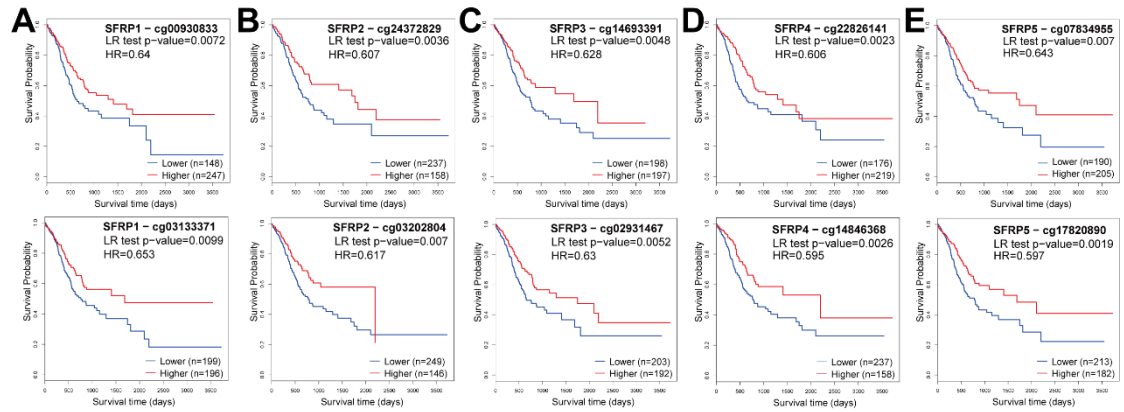

**Supplementary Figure S11.** Kaplan-Meier curves of low and high *SFRPs* DNA promoter CpG sites in GC patients (A: *SFRP1*, B: *SFRP2*, C: *SFRP3*, D: *SFRP4*, E: *SFRP5*). The method for survival analysis is Log-rank test.

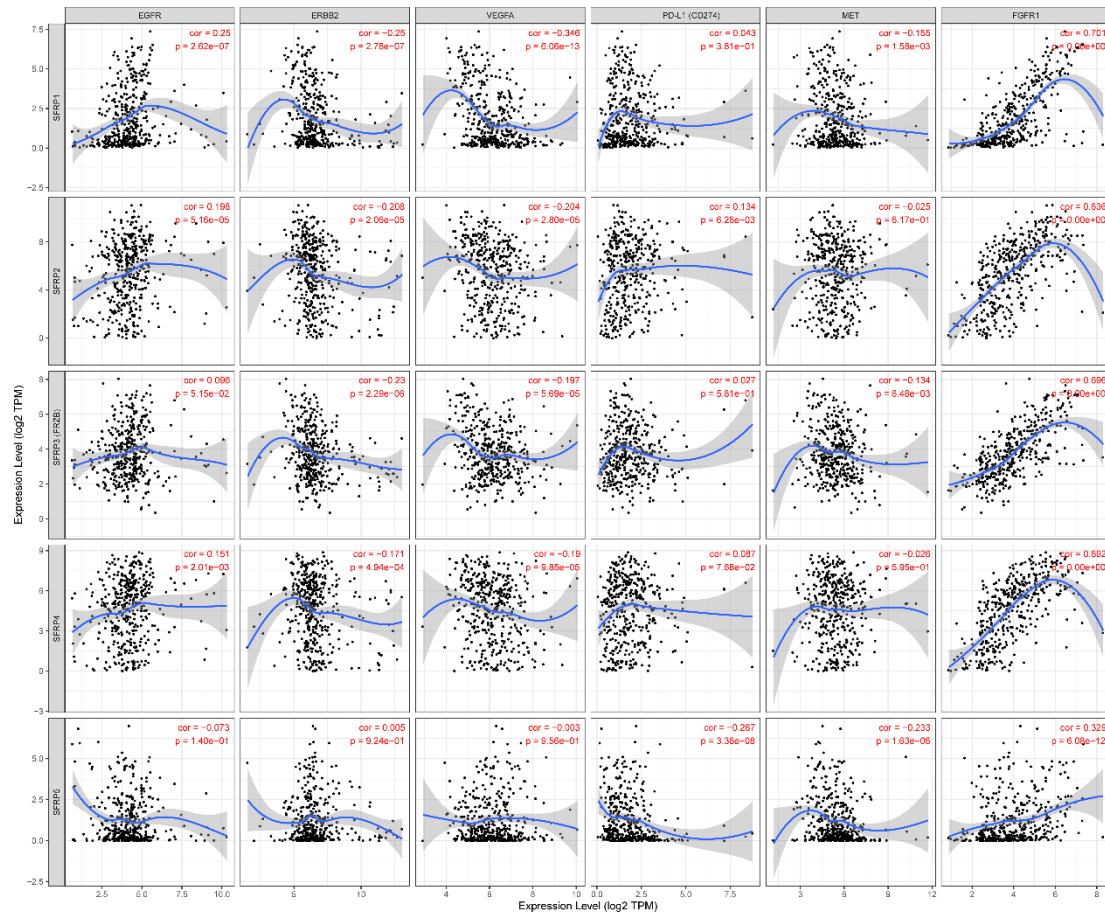

**Supplementary Figure S12.** Correlations between differentially expressed *SFRPs* and usual gene markers in GC (TIMER). Spearman's rho value was used for the analysis.
