# Supplementary material for: Comprehensive Analysis of SFRP Family Members Prognostic Value and Immune Infiltration in Gastric Cancer
Source: Life (Basel). 2021 Jun 3;11(6):522. doi: 10.3390/life11060522 (PMC8228899; doi:10.3390/life11060522)
Supplement: Supplementary file 1 [file life-11-00522-s001.zip › Supplementafy-tables.xlsx]

## Sheet: table S1
Supplementary Table S1. The infromation of database.
Database	DataType	DataSouces	UtilizedDataSets	SampleSize
Oncomine	RNA-seq, microarray	GEO, TCGA	342 gastric tumors and 152 normal samples	715 datasets and 86,733 samples
GEPIA	RNA-seq	TCGA, GTEx	408 gastric tumors and 211 normal samples	9736 tumors and 8587 normal samples
UALCAN	RNA-seq	TCGA, MET500 and CPTAC	415 gastric tumors and 34 normal samples	multidimensional cancer genomics data sets
Kaplan-Meier Plotter	mRNA, miRNA, protein data	GEO, EGA, and TCGA	875 GC patients	21 cancer types and 14,912 samples
MethSurv	DNA methyltion data	TCGA	395 GC patients	25 different cancer types and 7358 patients
cBioPortal	DNA copy-number data, mRNA and microRNA expression data, protein-level and phosphoprotein level data, DNA methylation data, and de-identified clinical data	TCGA, ICGC, published sequencing studies	777 gastric tumor samples	multidimensional cancer genomics data sets
TIMER	RNA-seq	TCGA	415 GC patients	10,897 samples across 32 cancer types

## Sheet: table S2
Supplementary table 2. The Cox proportional hazard model of SFRPs and clinical factors (TIMER).
SFRP1
	coef	HR	se(coef)	95%CI_l	95%CI_u	z	p	signif
SFRP1	0.106	1.111	0.05	1.007	1.227	2.096	0.036	*
Age	0.032	1.033	0.009	1.015	1.051	3.571	0	***
Gender: male	0.135	1.144	0.191	0.787	1.664	0.706	0.48
Stage2	0.326	1.386	0.341	0.711	2.703	0.958	0.338
Stage3	0.827	2.287	0.317	1.229	4.259	2.609	0.009	**
Stage4	1.502	4.492	0.37	2.175	9.278	4.059	0	***
Purity	-0.417	0.659	0.363	0.324	1.342	-1.149	0.251
Rsquare = 0.105 (max possible = 9.84e-01 )
Likelihood ratio test p = 4.64e-06
Wald test p = 4.99e-06
Score (logrank) test p = 2.52e-06
SFRP2
	coef	HR	se(coef)	95%CI_l	95%CI_u	z	p	signif
SFRP2	0.077	1.08	0.035	1.008	1.157	2.182	0.029	*
Age	0.03	1.03	0.009	1.012	1.048	3.284	0.001	**
Gender: male	0.102	1.107	0.191	0.761	1.611	0.534	0.594
Stage2	0.241	1.272	0.344	0.648	2.497	0.699	0.485
Stage3	0.787	2.197	0.319	1.176	4.105	2.468	0.014	*
Stage4	1.428	4.17	0.372	2.009	8.654	3.834	0	***
Purity	-0.457	0.633	0.36	0.313	1.284	-1.267	0.205
Rsquare = 0.107 (max possible = 9.84e-01 )
Likelihood ratio test p = 3.42e-06
Wald test p = 4.19e-06
Score (logrank) test p = 2.25e-06
SFRP3
	coef	HR	se(coef)	95%CI_l	95%CI_u	z	p	signif
FRZB	0.104	1.11	0.062	0.984	1.252	1.694	0.09
Age	0.033	1.033	0.009	1.015	1.052	3.582	0	***
Gender: male	0.092	1.097	0.192	0.753	1.597	0.482	0.63
Stage2	0.307	1.36	0.342	0.696	2.658	0.898	0.369
Stage3	0.802	2.23	0.319	1.193	4.168	2.512	0.012	*
Stage4	1.494	4.453	0.372	2.149	9.23	4.017	0	***
Purity	-0.456	0.634	0.362	0.312	1.288	-1.26	0.208
Rsquare = 0.101 (max possible = 9.84e-01 )
Likelihood ratio test p = 8.47e-06
Wald test p = 9.81e-06
Score (logrank) test p = 5.04e-06
SFRP4
	coef	HR	se(coef)	95%CI_l	95%CI_u	z	p	signif
SFRP4	0.082	1.085	0.039	1.005	1.171	2.089	0.037	*
Age	0.031	1.032	0.009	1.014	1.05	3.45	0.001	**
Gender: male	0.082	1.086	0.192	0.745	1.581	0.428	0.669
Stage2	0.246	1.279	0.345	0.651	2.512	0.713	0.476
Stage3	0.784	2.191	0.32	1.171	4.099	2.454	0.014	*
Stage4	1.454	4.279	0.372	2.064	8.87	3.909	0	***
Purity	-0.514	0.598	0.36	0.296	1.211	-1.428	0.153
Rsquare = 0.106 (max possible = 9.84e-01 )
Likelihood ratio test p = 4.14e-06
Wald test p = 5.5e-06
Score (logrank) test p = 2.82e-06
SFRP5
	coef	HR	se(coef)	95%CI_l	95%CI_u	z	p	signif
SFRP5	0.144	1.155	0.054	1.038	1.285	2.641	0.008	**
Age	0.032	1.033	0.009	1.014	1.051	3.516	0	***
Gender: male	0.128	1.137	0.191	0.782	1.652	0.67	0.503
Stage2	0.426	1.531	0.345	0.779	3.008	1.235	0.217
Stage3	0.955	2.598	0.323	1.381	4.888	2.96	0.003	**
Stage4	1.609	4.997	0.376	2.394	10.432	4.285	0	***
Purity	-0.668	0.513	0.366	0.25	1.052	-1.822	0.068
Rsquare = 0.111 (max possible = 9.84e-01 )
Likelihood ratio test p = 1.74e-06
Wald test p = 2.44e-06
Score (logrank) test p = 1.2e-06
